# Supplementary material for: A revised calibration of the interferometric mode of the CryoSat-2 radar altimeter improves ice height and height change measurements in western Greenland
Source: Copernicus journal article supplement (doi:10.5194/tc-11-1041-2017), 2017-05-04

The supplementary material includes.

1. A temporal sequence from 2012 to 2016 of 14 MODIS summer sub-images (a1.jpg to a14.jpg) of the area in west Greenland including the supra-glacial lake areas discussed in the paper. The positions of the L1 depression at ~ 1610 m elevation in the accumulation zone, and the depression at ~ 1020 m in the ablation zone are indicated by circles.
2. Five figures (‘yyyy_melt_lines.png’) are included for the years 2011 to 2016: Each figure shows the average waveform power as a function of elevation for 5 dates prior to and during the summer melt. The contrast between the June 20 2012 and the June 23 2013 results reflects the different melt patterns, particularly at higher elevations, in those two years.


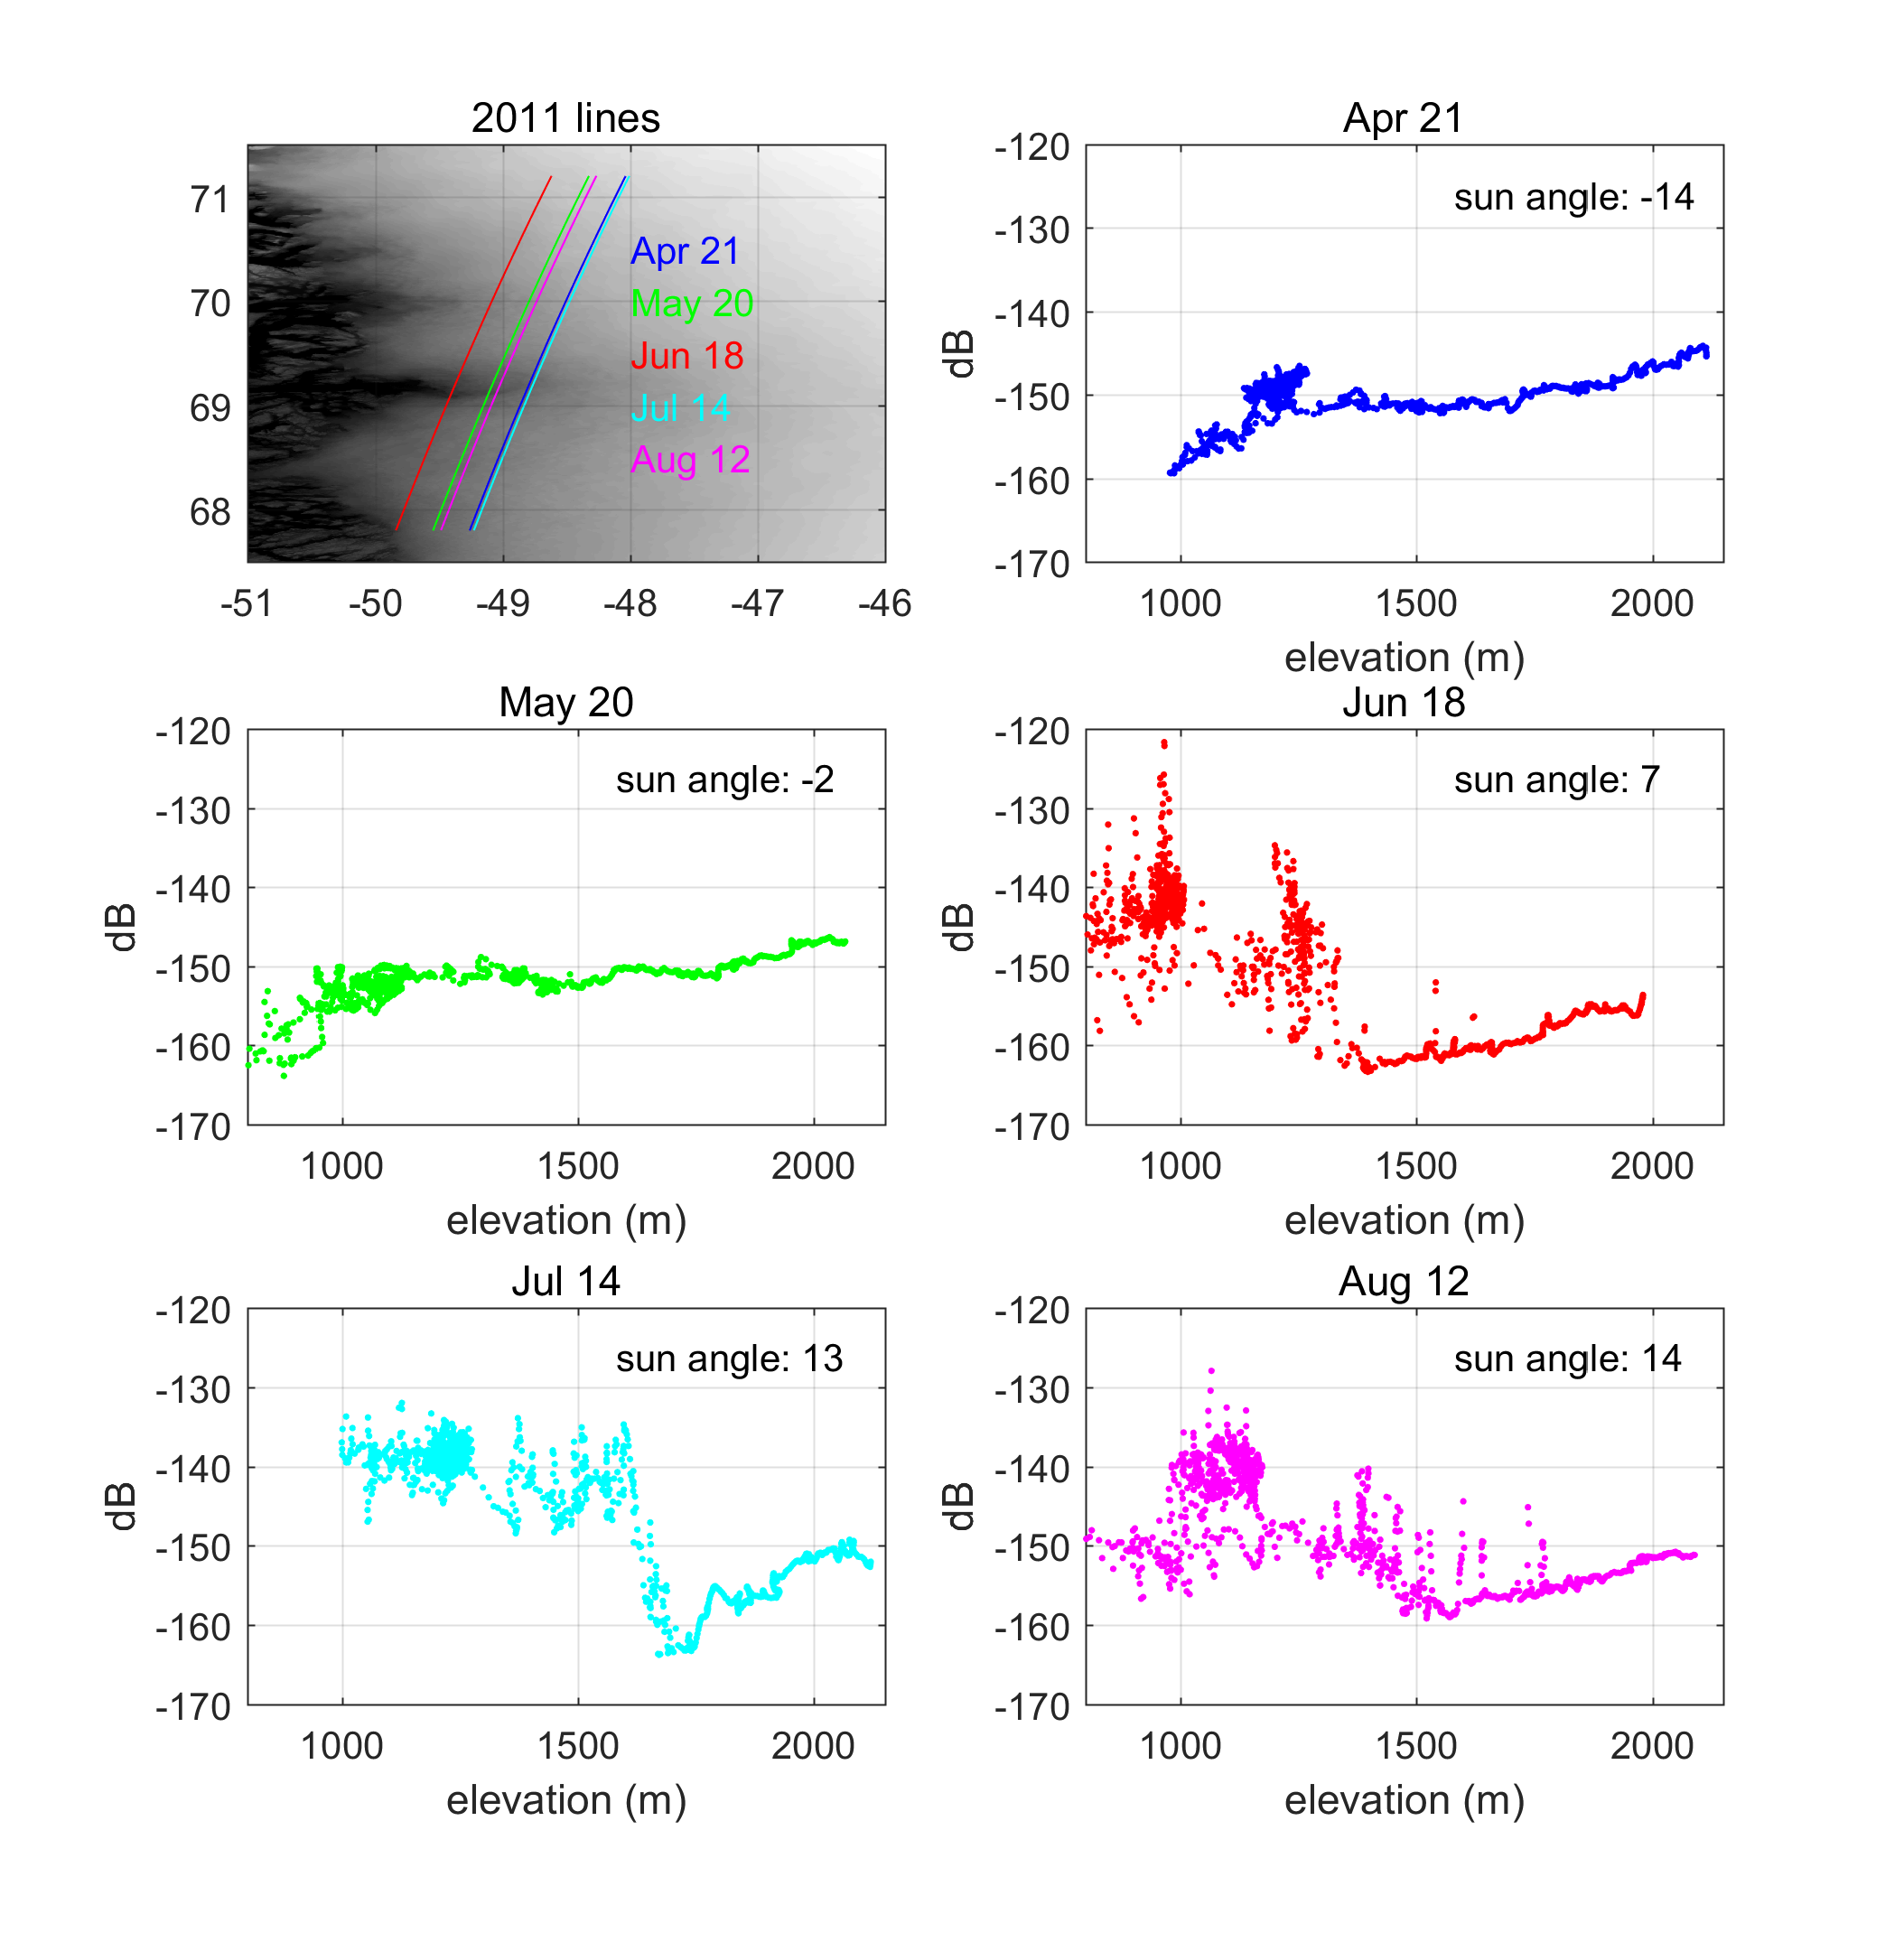


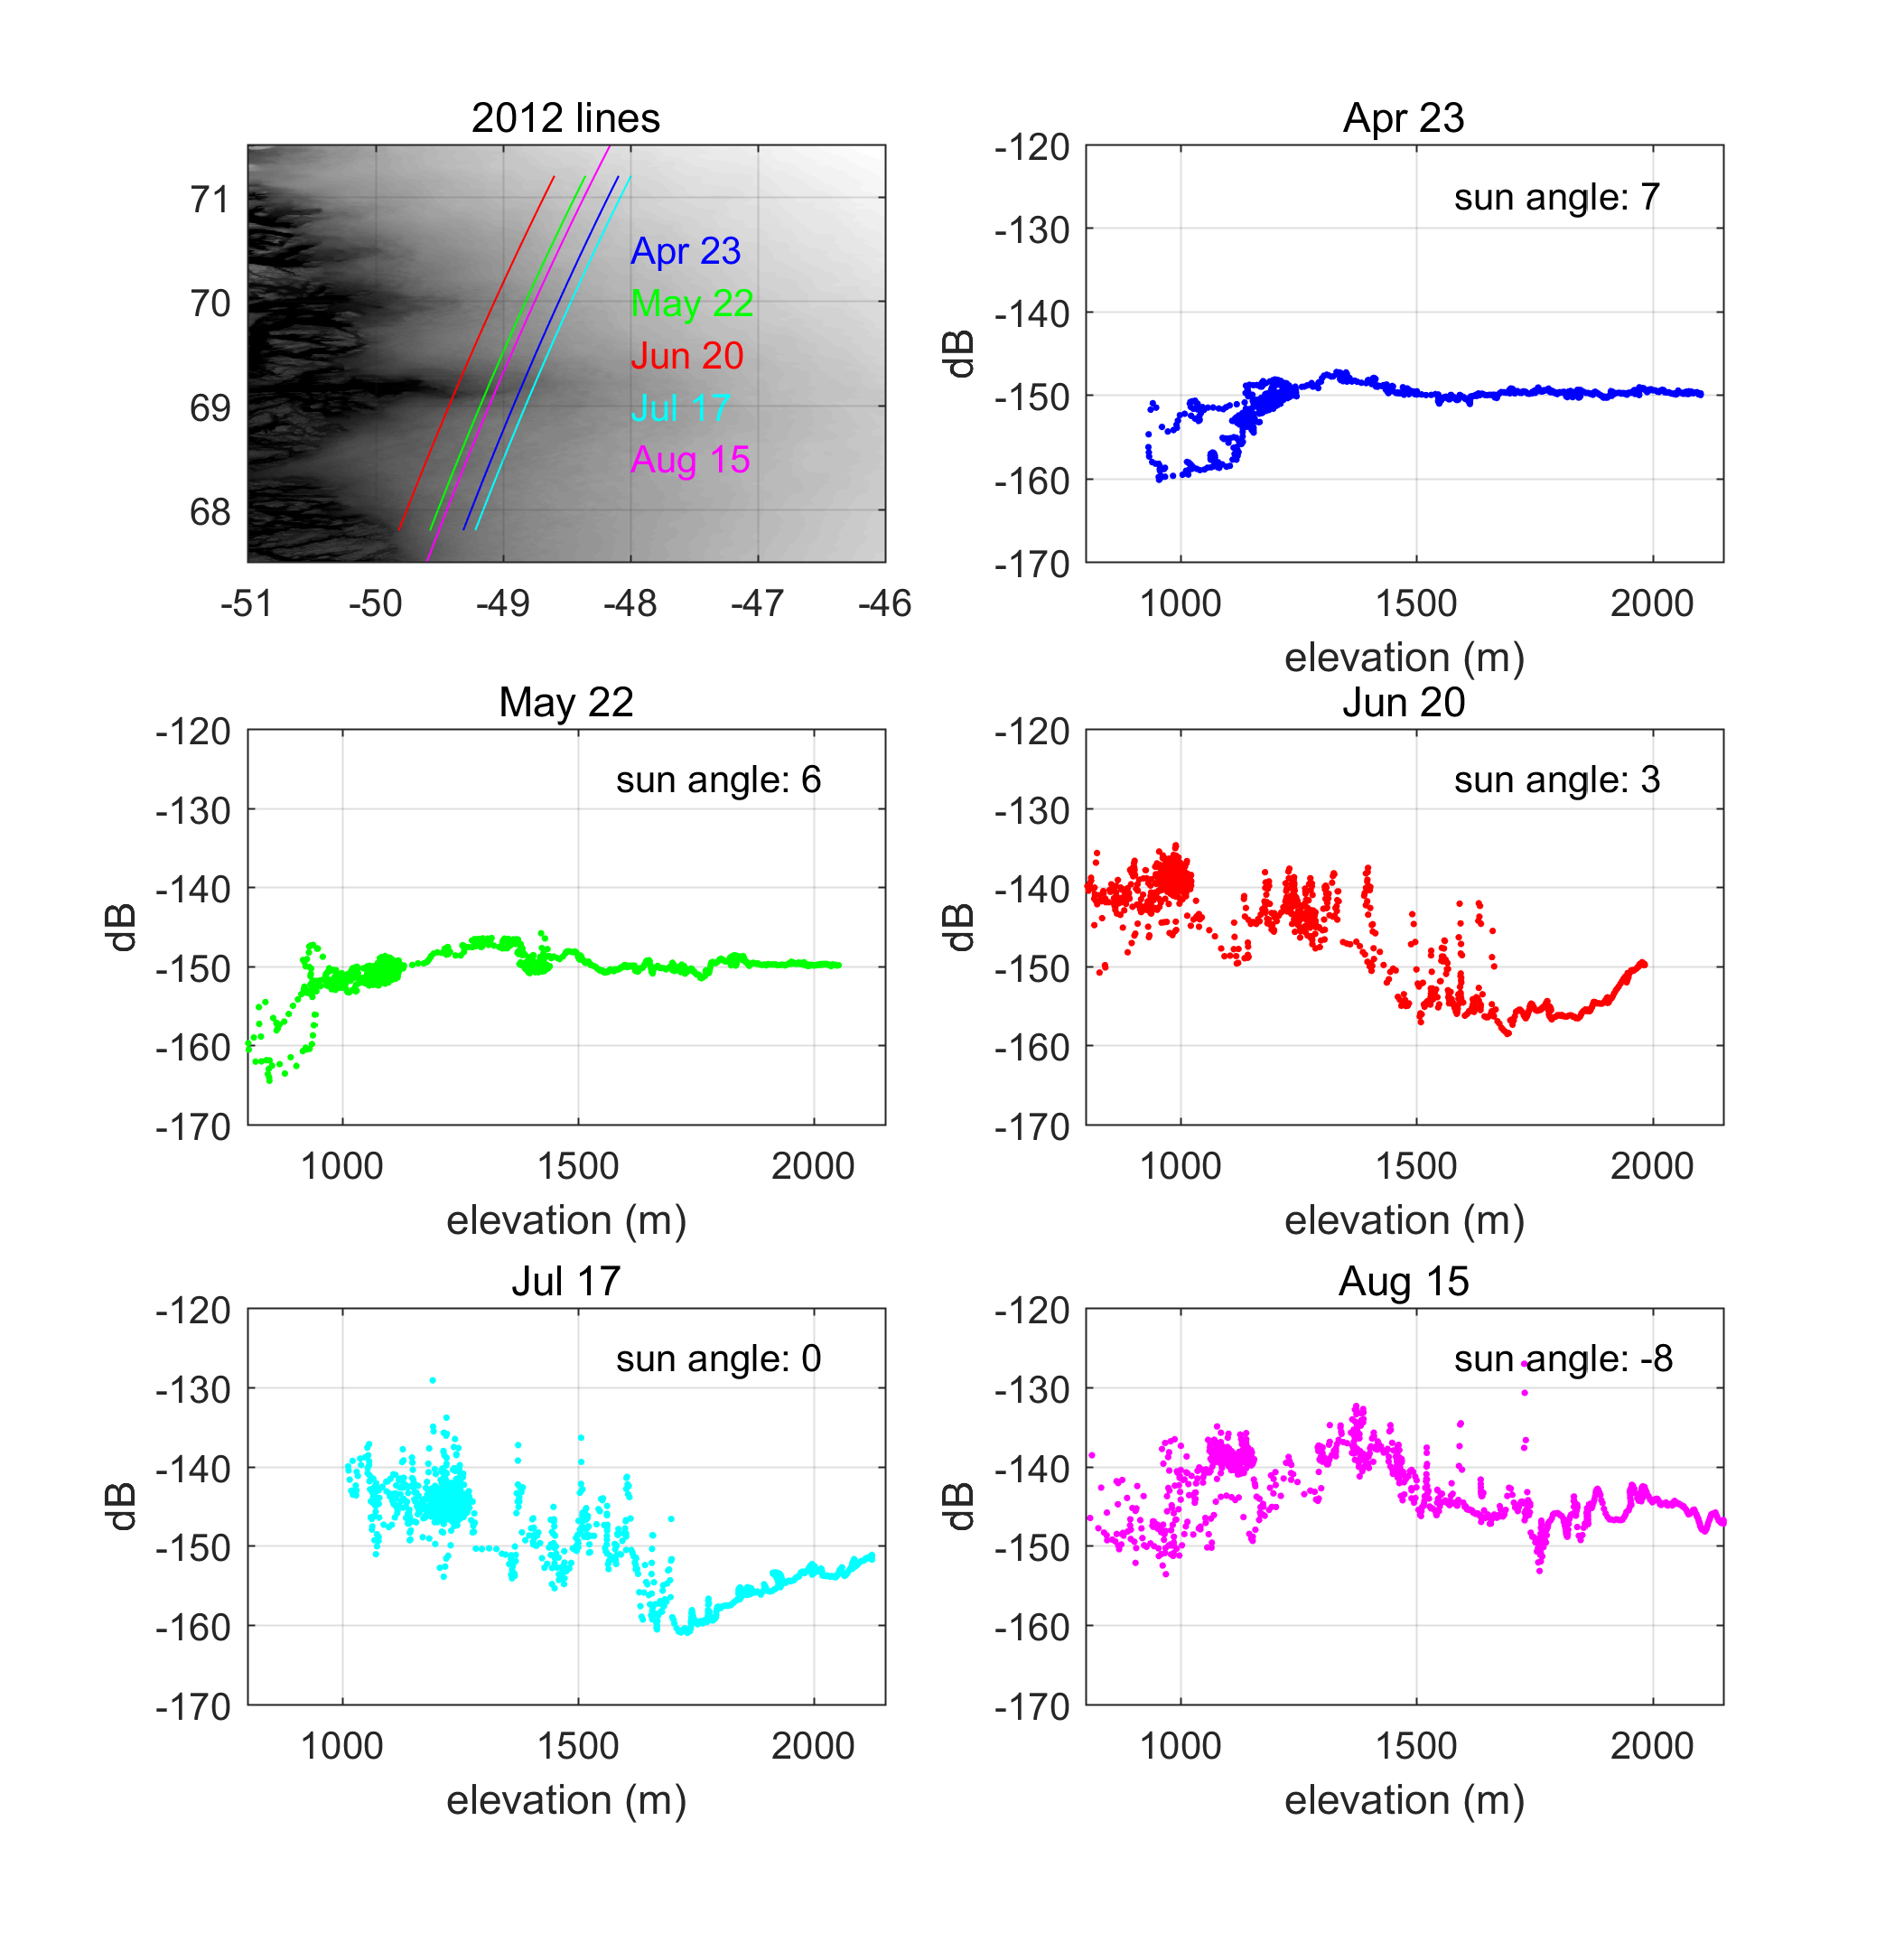


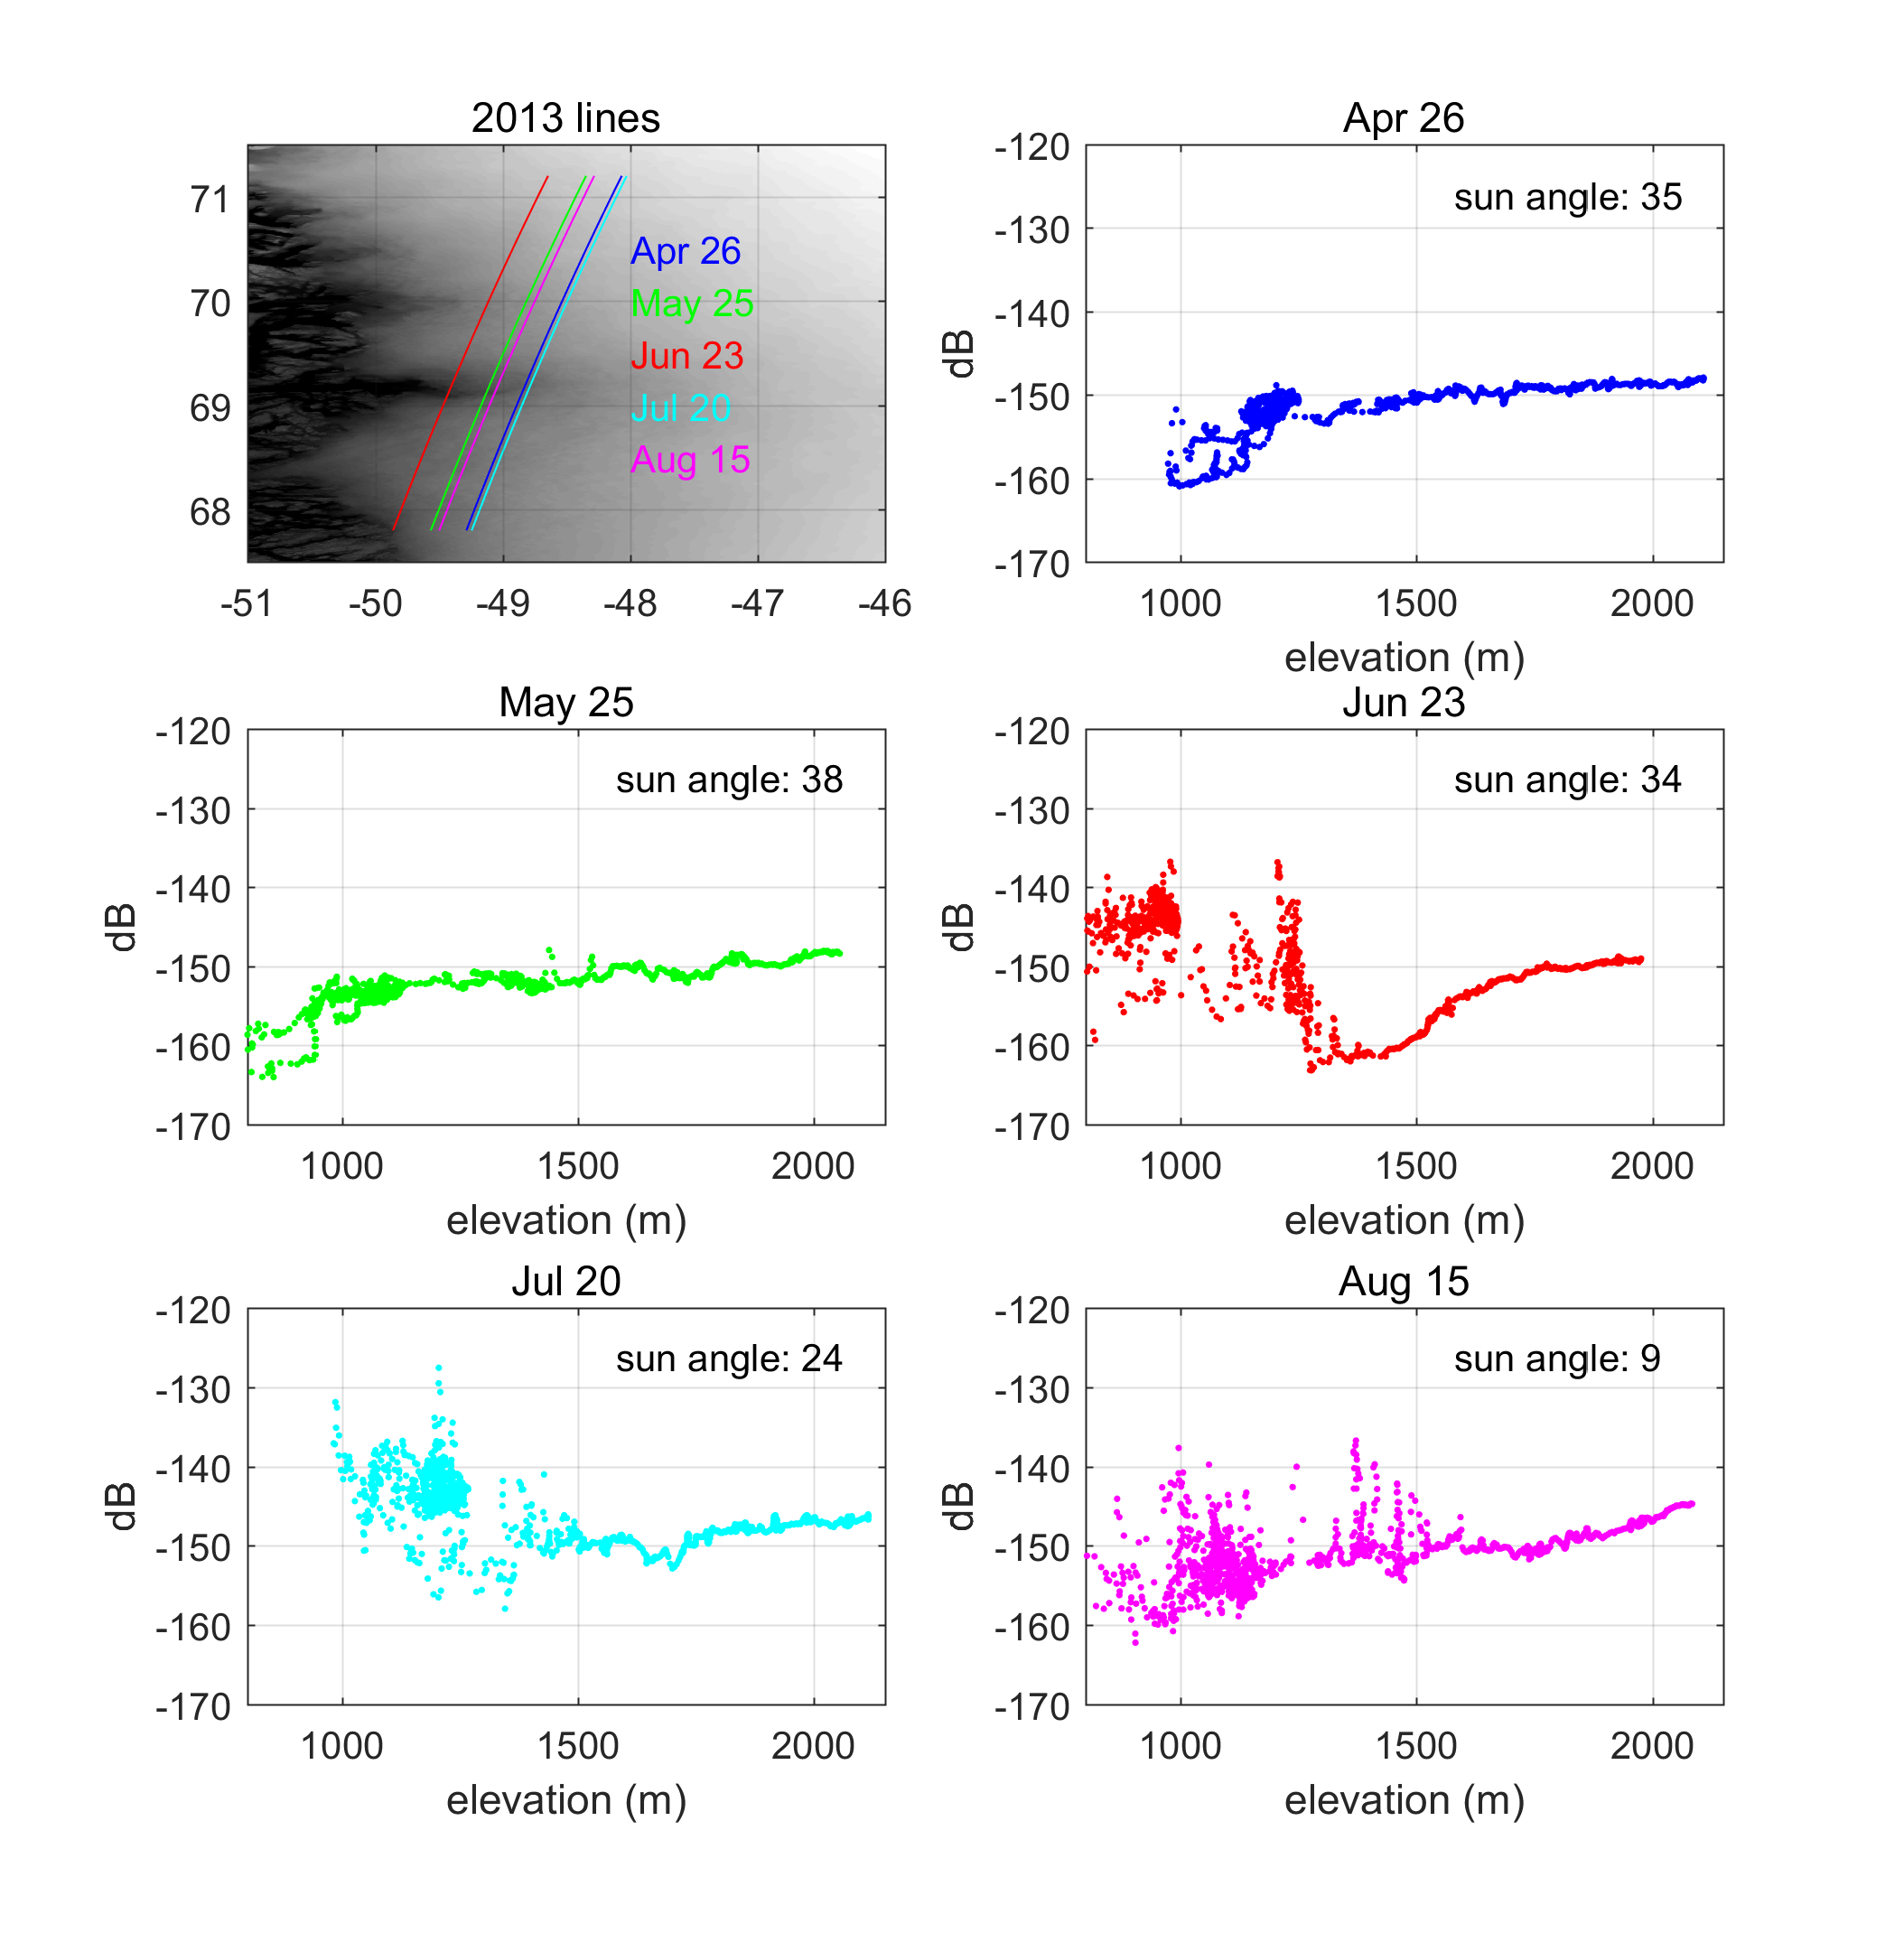


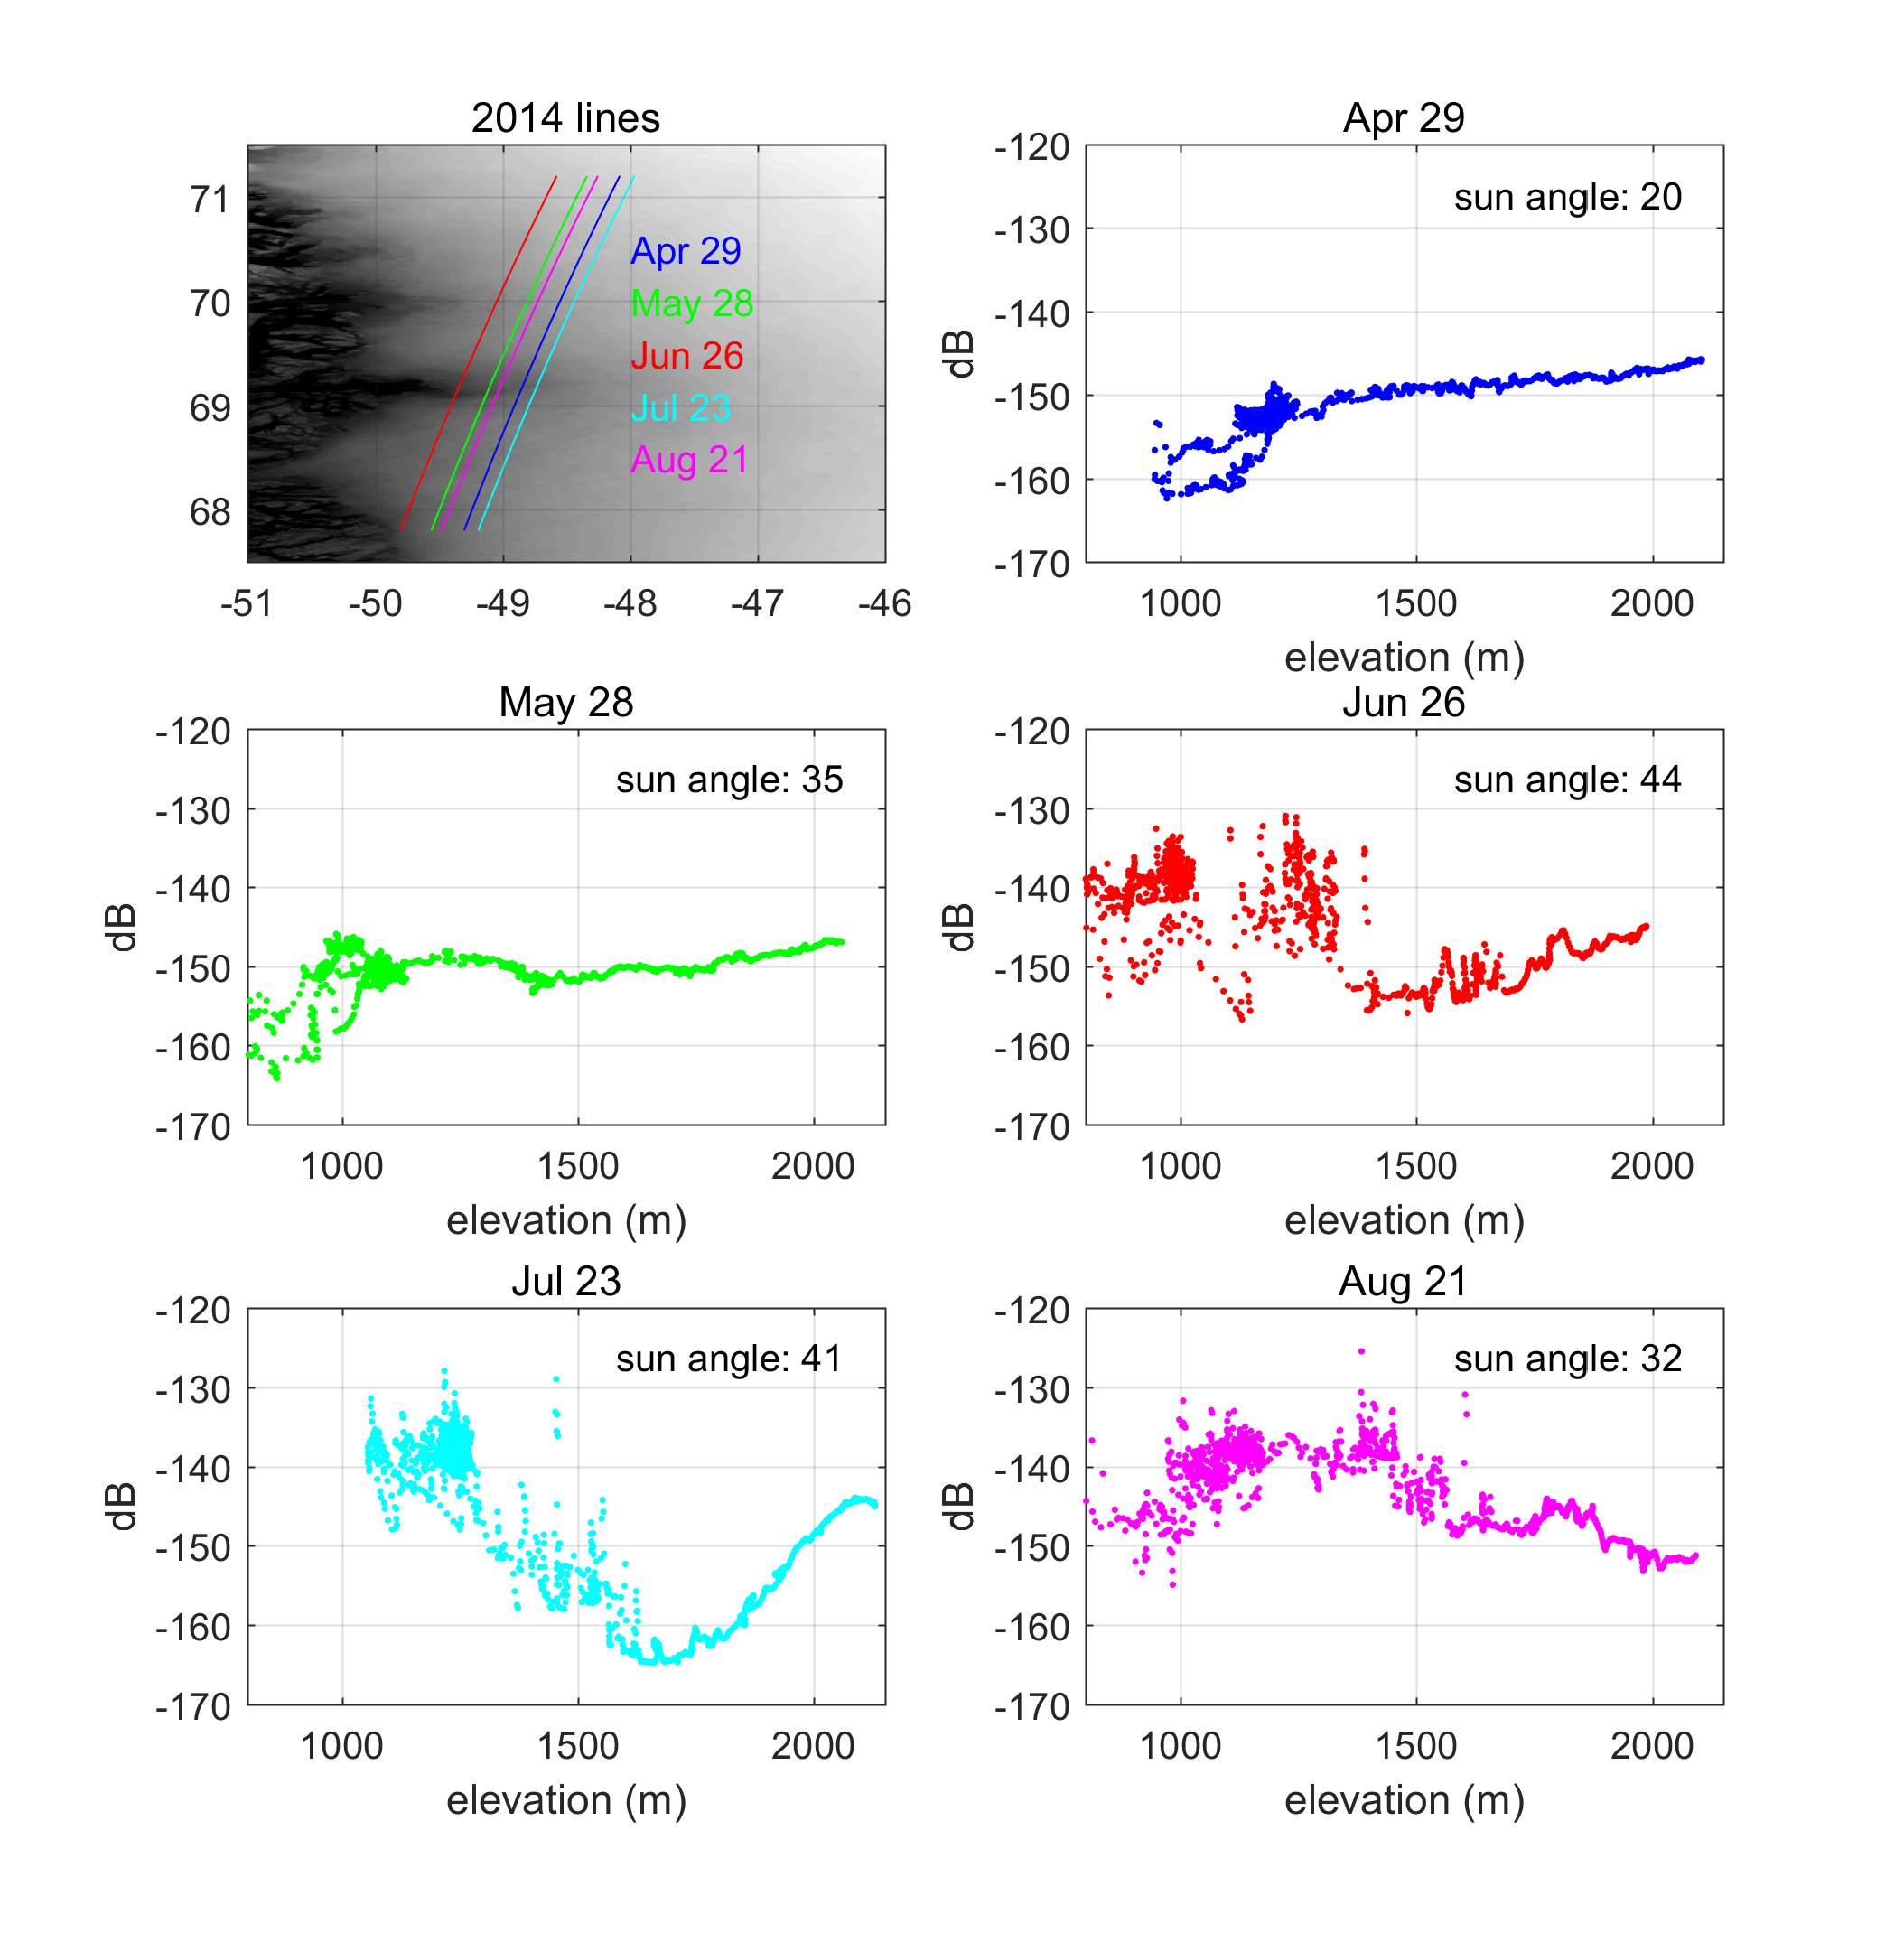


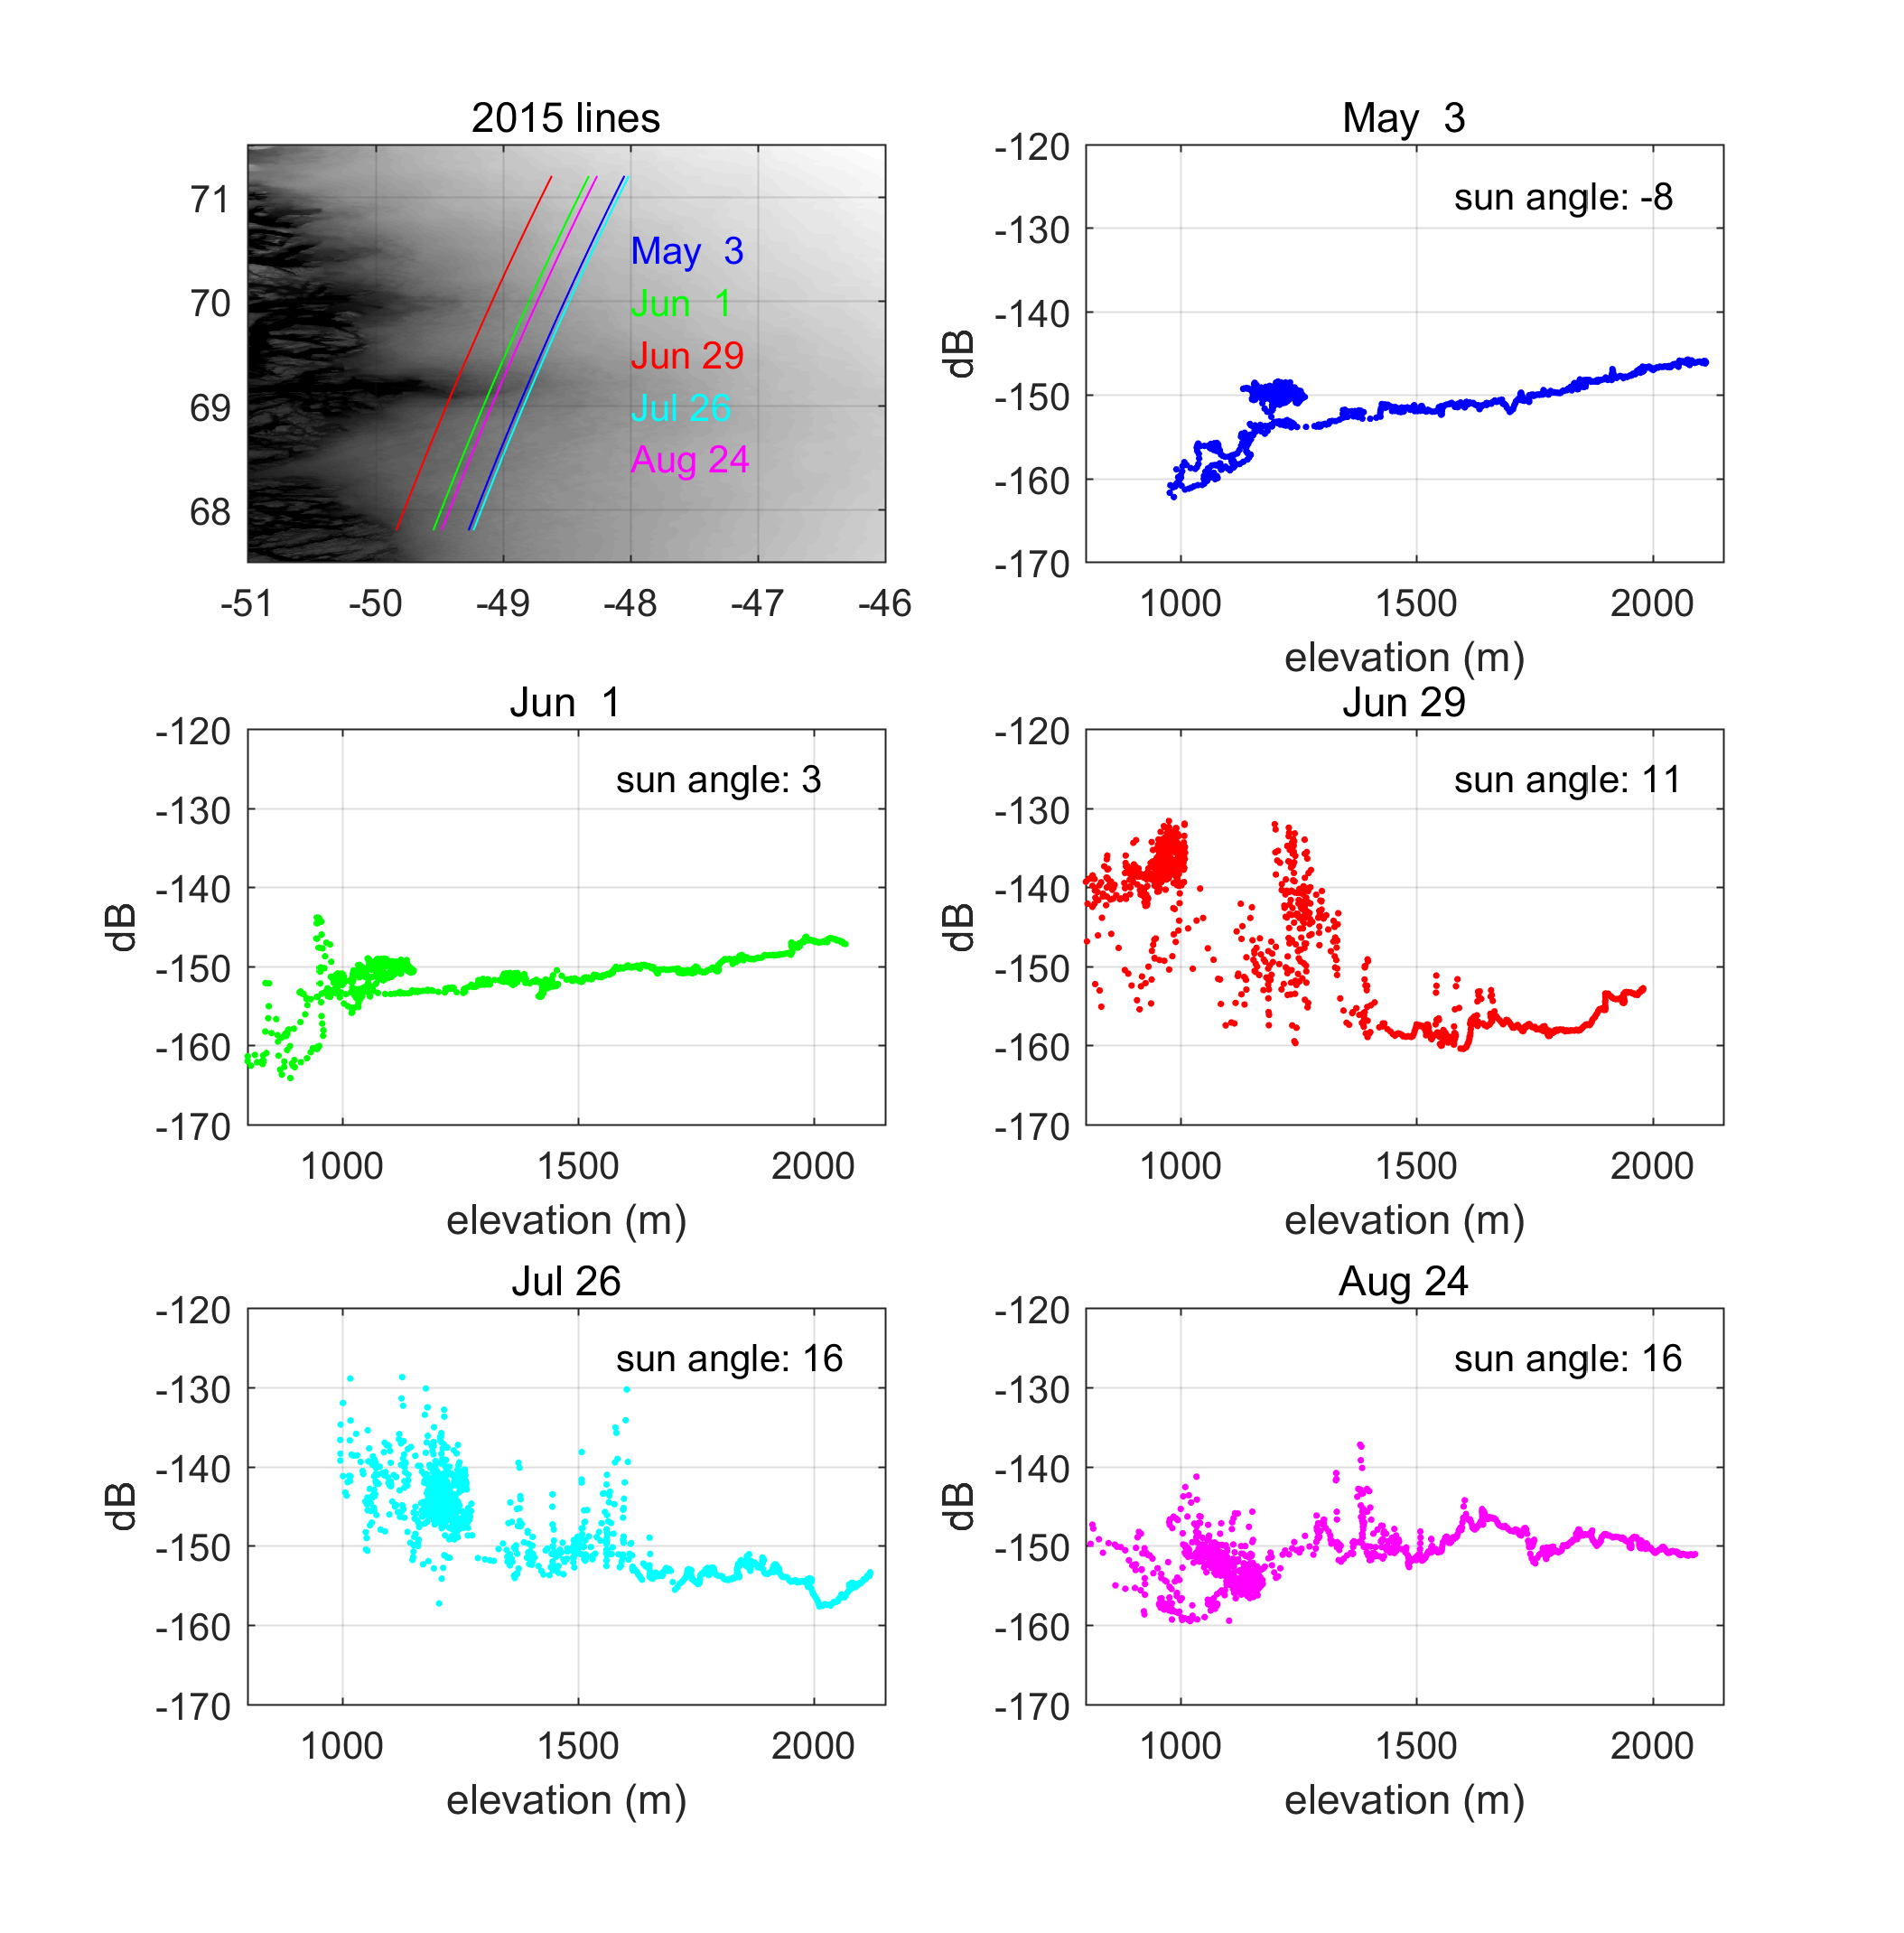


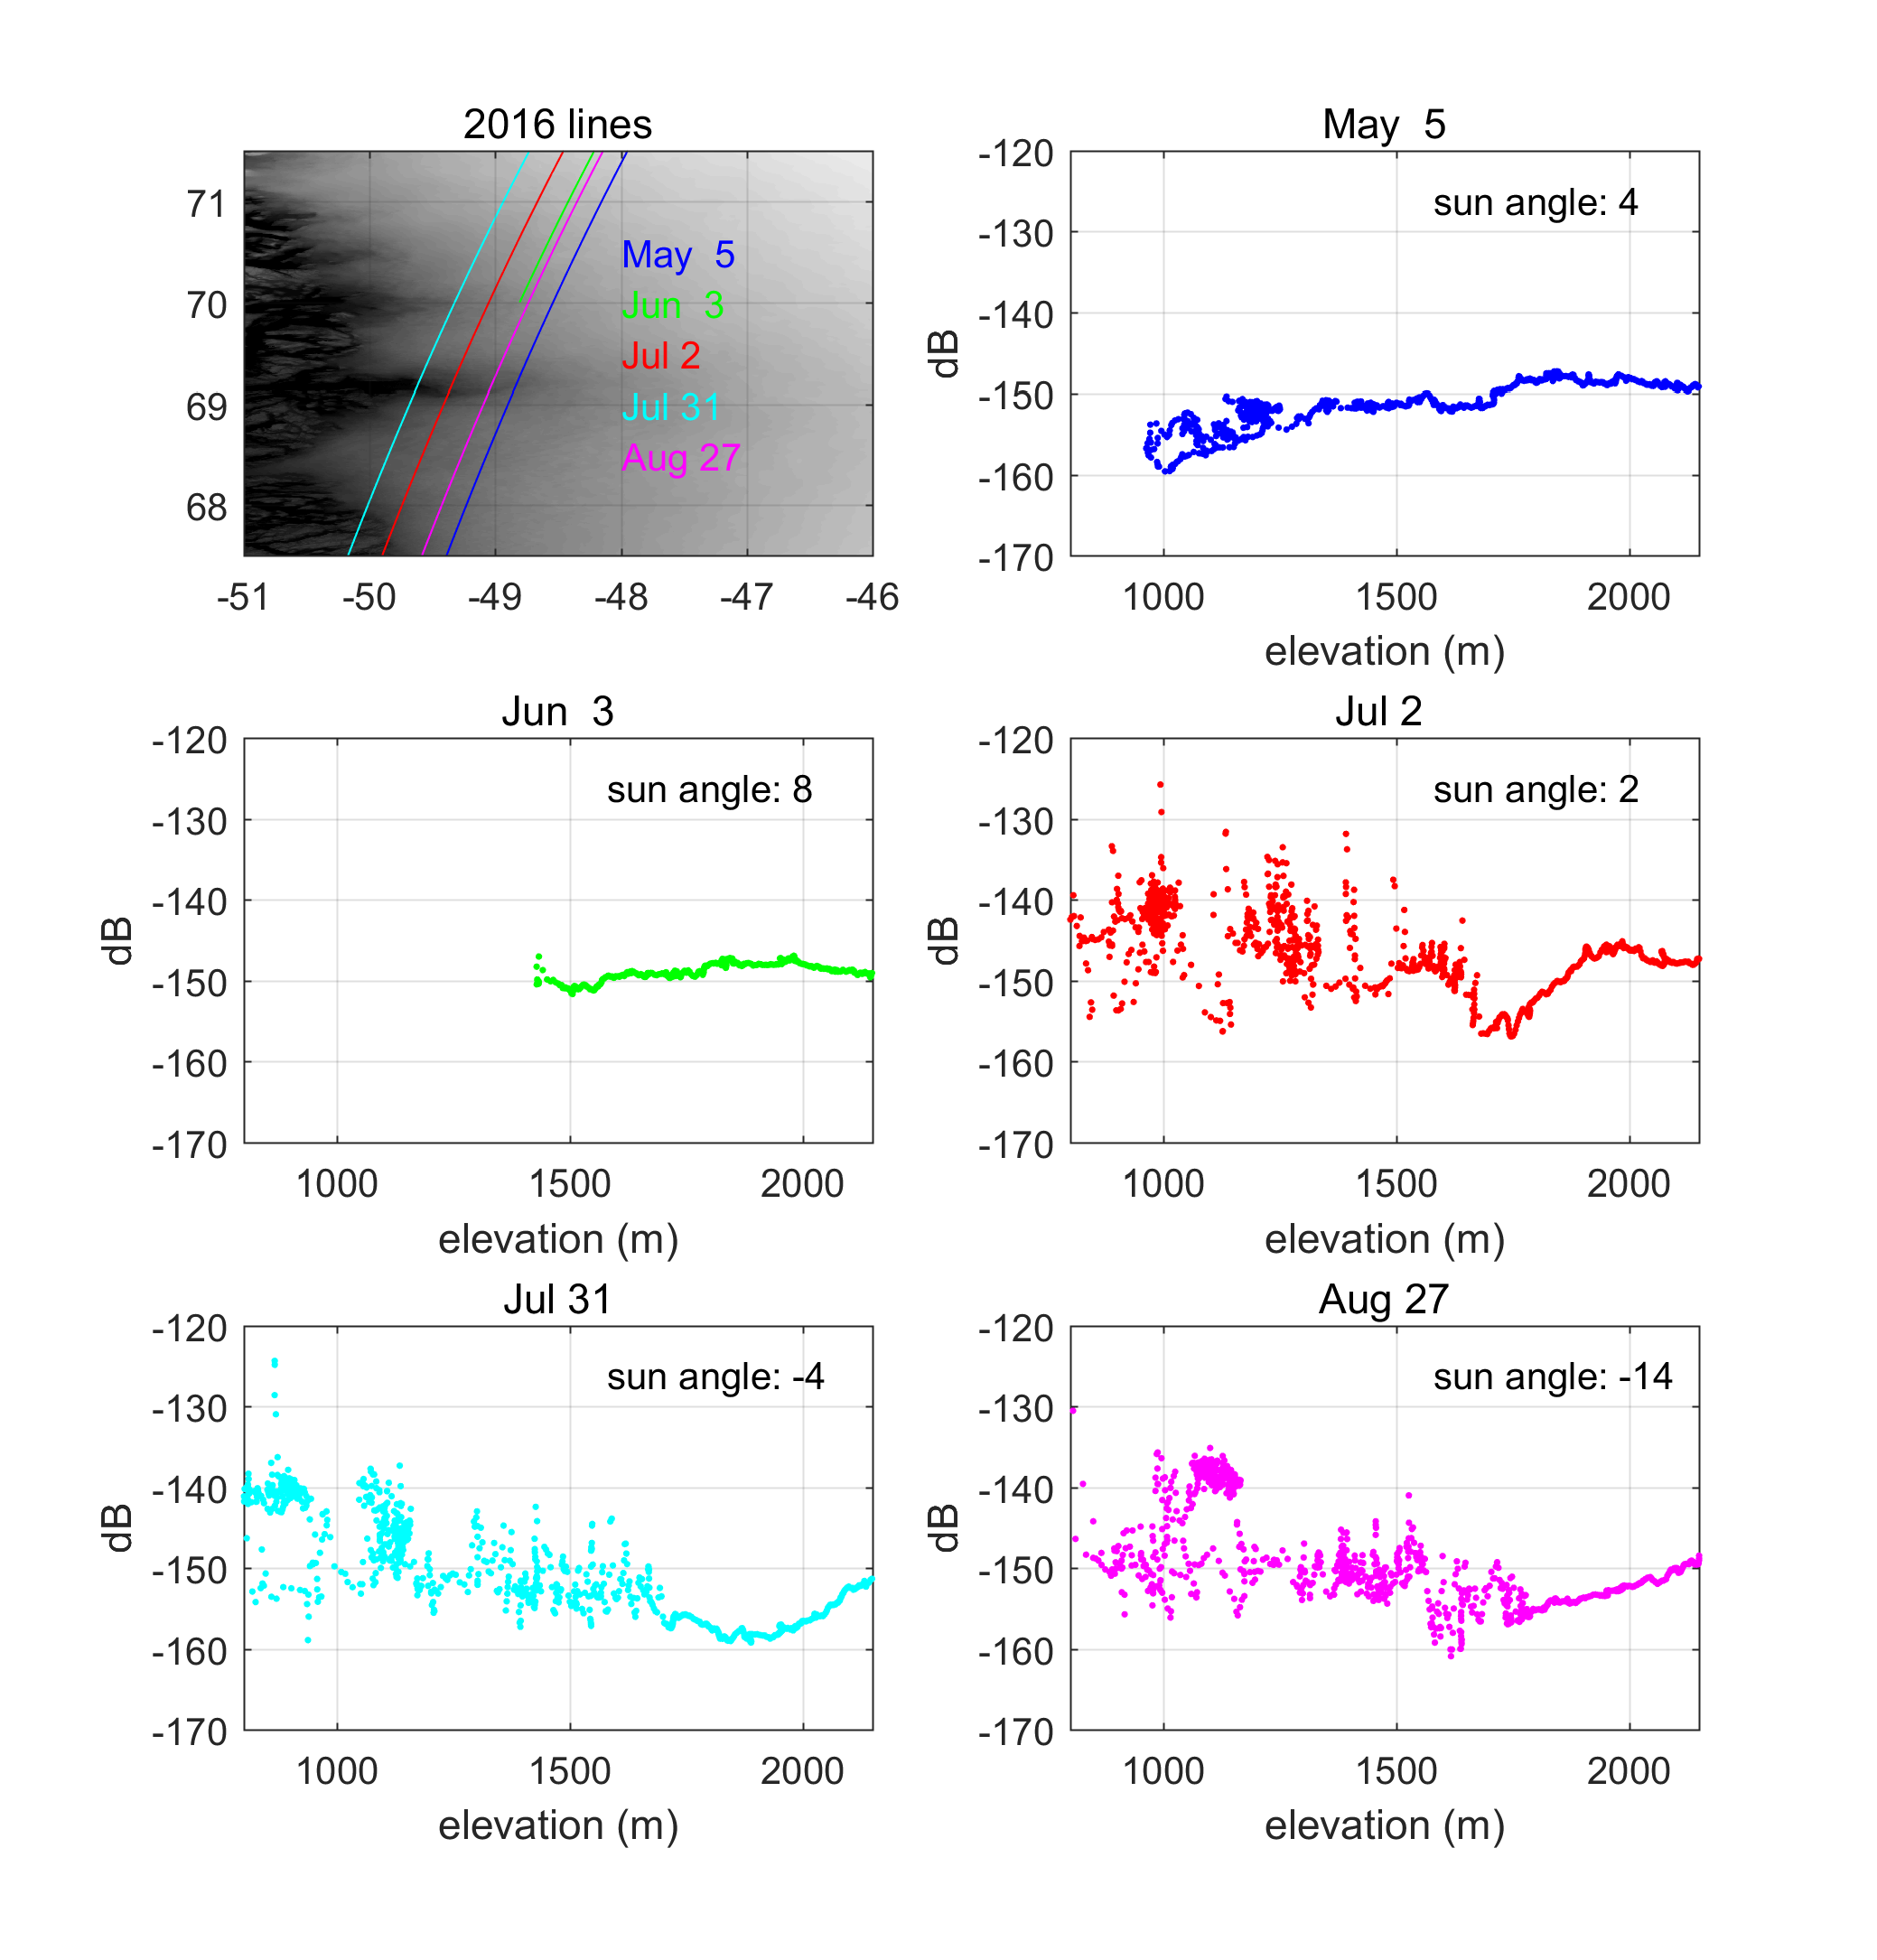

Supplement: Supplementary file 1 [file supplementary_material.docx]
