# Supplementary material for: A revised calibration of the interferometric mode of the CryoSat-2 radar altimeter improves ice height and height change measurements in western Greenland
Source: Copernicus journal article supplement (doi:10.5194/tc-11-1041-2017), 2017-05-04
Supplement: Supplementary file [file tc-11-1041-2017-supplement-title-page.pdf › tc-11-1041-2017-supplement-title-page.pdf]

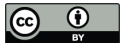

## *Supplement of*

# **A revised calibration of the interferometric mode of the CryoSat-2 radar altimeter improves ice height and height change measurements in western Greenland**

**Laurence Gray et al.**

*Correspondence to:* Laurence Gray (laurence.gray@sympatico.ca)

- tc-11-1041-2017-supplement-title-page.pdf
- supplementary\_material
  - 2011\_melt\_lines.png
  - 2012\_melt\_lines.png
  - 2013\_melt\_lines.png
  - 2014\_melt\_lines.png
  - 2015\_melt\_lines.png
  - a1.jpg
  - a10.jpg
  - a11.jpg
  - a12.jpg
  - a13.jpg
  - a14.jpg
  - a2.jpg
  - a3.jpg
  - a4.jpg
  - a5.jpg
  - a6.jpg
  - a7.jpg
  - a8.jpg
  - a9.jpg
  - supplementary\_material.docx

The copyright of individual parts of the supplement might differ from the CC-BY 3.0 licence.
